# Supplementary material for: Identification and quantification of seven sesquiterpene lactones in Inula britannica by HPLC-DAD-MS
Source: Royal Society of Chemistry journal article supplement (doi:10.1039/c9ay00118b), 2019-01-01
Supplement: c9ay00118b1.pdf [file c9ay00118b1.pdf]

## Supplementary

We have performed a series of experiments to obtain the optimum results (Table 1).

Table 1 The optimization of the extraction method

| NO. | particle size(mesh) | temperature(°C) | volume(mL) | time(min) | extraction efficiency(%) |
|-----|---------------------|-----------------|------------|-----------|--------------------------|
| 1   | 100                 | 35              | 30         | 60        | 7.35                     |
| 2   | 300                 | 35              | 30         | 60        | 7.48                     |
| 3   | 100                 | 55              | 30         | 60        | 7.43                     |
| 4   | 300                 | 55              | 30         | 60        | 7.54                     |
| 5   | 100                 | 45              | 20         | 45        | 7.81                     |
| 6   | 100                 | 45              | 40         | 75        | 8.12                     |
| 7   | 100                 | 45              | 40         | 45        | 7.93                     |
| 8   | 100                 | 45              | 20         | 75        | 7.86                     |
| 9   | 100                 | 45              | 30         | 75        | 7.57                     |
| 10  | 300                 | 45              | 30         | 45        | 7.64                     |
| 11  | 100                 | 45              | 30         | 75        | 7.49                     |
| 12  | 300                 | 45              | 30         | 45        | 7.78                     |
| 13  | 200                 | 35              | 20         | 60        | 7.56                     |
| 14  | 200                 | 55              | 20         | 60        | 7.72                     |
| 15  | 200                 | 35              | 40         | 60        | 7.68                     |
| 16  | 200                 | 55              | 40         | 60        | 7.91                     |
| 17  | 100                 | 45              | 20         | 60        | 7.45                     |
| 18  | 300                 | 45              | 20         | 60        | 7.59                     |
| 19  | 100                 | 45              | 40         | 60        | 7.52                     |
| 20  | 300                 | 45              | 40         | 60        | 7.66                     |
| 21  | 200                 | 35              | 30         | 45        | 7.73                     |
| 22  | 200                 | 55              | 30         | 45        | 7.87                     |
| 23  | 200                 | 35              | 30         | 75        | 7.75                     |
| 24  | 200                 | 55              | 30         | 75        | 8.07                     |
| 25  | 200                 | 45              | 30         | 60        | 8.27                     |
| 26  | 200                 | 45              | 30         | 60        | 8.26                     |
| 27  | 200                 | 45              | 30         | 60        | 8.23                     |
| 28  | 200                 | 45              | 30         | 60        | 8.28                     |
| 29  | 200                 | 45              | 30         | 60        | 8.21                     |

The optimization of extraction method was determined and analysed by Design-ExpertV8.0.5.

Particle size (A), temperature (B), volume (C), and time (D) were taken as the influencing factors, and extraction efficiency Y as the response value. Multivariate regression fitting was performed on the experimental data with Design-ExpertV8.0.5 software, and the regression equation was obtained:

$$Y = -2.941 + 0.027A + 0.261B + 0.113C + 0.045D - 0.005AB + 0.004AC + 0.012AD + 0.017BC + 0.003BD + 0.002CD - 0.052A^2 - 0.032B^2 - 0.021C^2 - 0.004D^2$$

Box-Behnken Design was used to analyze the variance of the regression equation of the above experiments, and the results are shown in table 2.

Table 2 ANOVA of regression equation

| Source         | Sum of Square | df | Mean Square | F Value | Prob > F |
|----------------|---------------|----|-------------|---------|----------|
| Model          | 2.22          | 14 | 0.16        | 68.64   | < 0.0001 |
| A              | 0.065         | 1  | 0.065       | 27.88   | 0.0001   |
| B              | 0.082         | 1  | 0.082       | 35.28   | < 0.0001 |
| C              | 0.057         | 1  | 0.057       | 24.8    | 0.0002   |
| D              | 0.039         | 1  | 0.039       | 16.65   | 0.0011   |
| AB             | 0.001         | 1  | 0.001       | 0.043   | 0.8383   |
| AC             | 0.004         | 1  | 0.004       | 0       | 1        |
| AD             | 0.009         | 1  | 0.009       | 0.39    | 0.543    |
| BC             | 0.012         | 1  | 0.012       | 0.53    | 0.4789   |
| BD             | 0.008         | 1  | 0.008       | 3.5     | 0.0825   |
| CD             | 0.005         | 1  | 0.005       | 2.12    | 0.1677   |
| A <sup>2</sup> | 1.61          | 1  | 1.61        | 701.69  | < 0.0001 |
| B <sup>2</sup> | 0.59          | 1  | 0.59        | 255     | < 0.0001 |
| C <sup>2</sup> | 0.29          | 1  | 0.29        | 125.54  | < 0.0001 |
| D <sup>2</sup> | 0.079         | 1  | 0.079       | 34.16   | < 0.0001 |
| Residual       | 0.032         | 14 | 0.002       |         |          |
| Lack of Fit    | 0.029         | 10 | 0.003       | 3.41    | 0.1241   |

The Model F-value of 68.64 implies the model is significant. There is only a

0.01% chance that a "Model F-Value" this large could occur due to noise. Values of "Prob > F" less than 0.0500 indicate model terms are significant. In this case A, B, C, D, A<sup>2</sup>, B<sup>2</sup>, C<sup>2</sup>, D<sup>2</sup> are significant model terms.

The optimization of extraction method was analysed by Design-ExpertV8.0.5 and obtain the optimum results as follows: 200 mesh of sample powders and 30 mL methanol under ultra sonication conditions at 45 °C held for 60 min.

| Number | A      | B     | C     | D     | Y    | Desirability |
|--------|--------|-------|-------|-------|------|--------------|
| 1      | 207.70 | 46.66 | 31.97 | 64.91 | 8.28 | 0.995        |
